# Supplementary material for: Expert Programmers Have Fine-Tuned Cortical Representations of Source Code
Source: eNeuro. 2021 Jan 25;8(1):ENEURO.0405-20.2020. doi: 10.1523/ENEURO.0405-20.2020 (PMC7877476; doi:10.1523/ENEURO.0405-20.2020)
Supplement: Extended Data Figure 1-1 — Description of categories and subcategories provided to subjects in the experiment. Download Figure 1-1, XLSX file. [file enu-eN-NWR-0405-20-s06.xlsx]

## Sheet: Sheet1
Extended Data Figure 1-1: Description of categories and subcategories provided to subjects in the experiment
Category	Description
Math	Applying number theory processing on given inputs.
Search	Identifying a specific item in a list of given inputs.
Sort	Arranging given inputs into a certain order.
String	Applying a specific operation on string inputs.
Subcategory	Description
Greatest common divisor	Finding the greatest common divisor of two given natural numbers.
Power	Calculating the powers of two given integers m and n, i.e. n-th power of m.
Primality test	Judging whether the given natural number is a prime number or not.
Binary search	A process to search for a value from the given input sequence that is equal to the target value. This process first compares the target value with the middle value of the given sequence and specify the half of the sequence that potentially contains the target value. This process iterates the comparison and sequence division until the target value is found.
Linear search	A process to search for a value from the given input sequence that is equal to the target value. This process examines in order from the first element of the given series.
Bubble sort	Arranging given inputs in a certain order by exchanging adjacent elements if they are in wrong order.
Insertion sort	Arranging given inputs in a certain order by iteratively picking up an element from the given input sequence and insert it to the correct location.
Selection sort	A process to arrange given inputs in a certain order. This process first identify the smallest value of the given inputs and exchange it with the value in the first order. Then, identify the second smallest value and exchange it with the value in the second order. This process iterates this operation until the given inputs are correctly sorted.
Run length encode	A process to compress the given string sequence by replacing a sequence of the same character with the character and the number of repetition. For example, the string sequence ‘AAAABBBAABBBB’ will be compressed as ‘4A3B2A4B’.
String sort	Sorting the given words in lexicographic order.
Substring search	Detecting where the given pattern appears in the given string sequence.
