# Supplementary material for: Expert Programmers Have Fine-Tuned Cortical Representations of Source Code
Source: eNeuro. 2021 Jan 25;8(1):ENEURO.0405-20.2020. doi: 10.1523/ENEURO.0405-20.2020 (PMC7877476; doi:10.1523/ENEURO.0405-20.2020)
Supplement: Extended Data Figure 2-1 — Behavioral performance of each category in the fMRI experiment. Numerics from 3rd (Math) to last columns denote mean ± SD. One-way ANOVA found no significant difference in behavioral performances between categories for any groupings (expert, F(3,36) = 1.38, p = 0.27; middle, F(3,36) = 2.99, p = 0.06; novice, F(3,36) = 2.81, p = 0.07; all, F(3,116) = 2.02, p = 0.12). Download Figure 2-1, XLSX file. [file enu-eN-NWR-0405-20-s08.xlsx]

## Sheet: Sheet1
Extended Data Figure 2-1: Behavioral performance of each category in the fMRI experiment.
Numerics from 3rd (Math) to last columns denote 'MEAN±SD'. One-way ANOVA found no significant difference in behavioral performances between categories for any groupings (Expert, F(3,36) = 1.38, p = 0.27; Middle, F(3,36) = 2.99, p = 0.06; Novice, F(3,36) = 2.81, p = 0.07; All, F(3,116) = 2.02, p = 0.12).
Recruit class	N	Math	Search	Sort	String
Expert	10	93.8 ± 11.4	89.4 ± 11.8	84.8 ± 9.2	86.3 ± 8.4
Middle	10	68.1 ± 15.0	77.8 ± 16.2	70.2 ± 15.6	83.1 ± 9.5
Novice	10	72.2 ± 15.2	53.0 ± 20.1	60.4 ± 19.1	72.2 ± 12.5
All	30	78.1 ± 17.7	73.4 ± 22.1	71.8 ± 17.9	80.6 ± 11.6
